# Supplementary material
Source: PubMed Central journal article supplement (PMC7398833)
Supplement: NIHMS1583280-supplement-1.pdf [file NIHMS1583280-supplement-1.pdf]

---

Incidence and Survival by Human Epidermal Growth Factor Receptor-2 Status in Young Women with Stage I-III Breast Cancer: SEER 2010-2016

Supplemental Tables and Figures

Supplementary Table S1. Unknown cancer stage by year among women aged 20-49 years diagnosed with breast cancer, 2010-2016, SEER 18 registries

Supplementary Table S2. Exclusions among women aged 20-49 years diagnosed with stage I-III breast cancer, 2010-2016, SEER 18 registries

Supplementary Figure S1. Five-year survival by race/ethnicity and HER2/HR status for women aged 20-49 years diagnosed with stage I-III breast cancer, 2010-2015, SEER 18 registries

Journal Pre-proof

Supplementary Table S1. Unknown cancer stage by year among women aged 20-49 years diagnosed with breast cancer, 2010-2016, SEER 18 registries

|               | <b>All stage classifications</b> | <b>Unknown stage</b> |
|---------------|----------------------------------|----------------------|
|               | <b>N</b>                         | <b>N (%)</b>         |
| <b>Year</b>   |                                  |                      |
| 2010          | 10,992                           | 364 (3.3)            |
| 2011          | 11,422                           | 338 (3.0)            |
| 2012          | 11,196                           | 334 (3.0)            |
| 2013          | 11,290                           | 323 (2.9)            |
| 2014          | 11,236                           | 306 (2.7)            |
| 2015          | 11,370                           | 274 (2.4)            |
| 2016          | 11,205                           | 239 (2.1)            |
| All 2010-2016 | 78,711                           | 2,178 (2.8)          |

Abbreviations: HER2, human epidermal growth factor receptor-2; HR, hormone receptor; SEER, Surveillance, Epidemiology, and End Results  
 Women with cancer diagnoses classified as stage 0 (n=86), IV (n=3,998), or NA (n=87) were also excluded from the analytic sample.

Supplementary Table S2. Exclusions among women aged 20-49 years diagnosed with stage I-III breast cancer, 2010-2016, SEER 18 registries

|               | <b>All HER2/HR classifications</b> | <b>Borderline HER2 status</b> | <b>Unknown HER2 status, known HR status</b> | <b>HER2<sup>+</sup> or HER2<sup>-</sup>, unknown HR status</b> | <b>Unknown HER2 and HR status</b> | <b>Excluded in analytic sample</b> |
|---------------|------------------------------------|-------------------------------|---------------------------------------------|----------------------------------------------------------------|-----------------------------------|------------------------------------|
|               | <b>N</b>                           | <b>N (%)</b>                  | <b>N (%)</b>                                | <b>N (%)</b>                                                   | <b>N (%)</b>                      | <b>N (%)</b>                       |
| <b>Year</b>   |                                    |                               |                                             |                                                                |                                   |                                    |
| 2010          | 10,061                             | 220 (2.2)                     | 295 (2.9)                                   | 32 (0.3)                                                       | 231 (2.3)                         | 778 (7.7)                          |
| 2011          | 10,467                             | 210 (2.0)                     | 214 (2.0)                                   | 20 (0.2)                                                       | 226 (2.2)                         | 670 (6.4)                          |
| 2012          | 10,287                             | 173 (1.7)                     | 170 (1.7)                                   | 13 (0.1)                                                       | 147 (1.4)                         | 503 (4.9)                          |
| 2013          | 10,362                             | 167 (1.6)                     | 147 (1.4)                                   | 11 (0.1)                                                       | 155 (1.5)                         | 480 (4.6)                          |
| 2014          | 10,337                             | 191 (1.8)                     | 153 (1.5)                                   | 9 (0.1)                                                        | 135 (1.3)                         | 488 (4.7)                          |
| 2015          | 10,531                             | 204 (1.9)                     | 145 (1.4)                                   | 8 (0.1)                                                        | 119 (1.1)                         | 476 (4.5)                          |
| 2016          | 10,317                             | 189 (1.8)                     | 147 (1.4)                                   | 9 (0.1)                                                        | 92 (0.9)                          | 437 (4.2)                          |
| All 2010-2016 | 72,362                             | 1,354 (1.9)                   | 1,271 (1.8)                                 | 102 (0.1)                                                      | 1,105 (1.5)                       | 3,832 (5.3)                        |

Abbreviations: HER2, human epidermal growth factor receptor-2; HR, hormone receptor; SEER, Surveillance, Epidemiology, and End Results

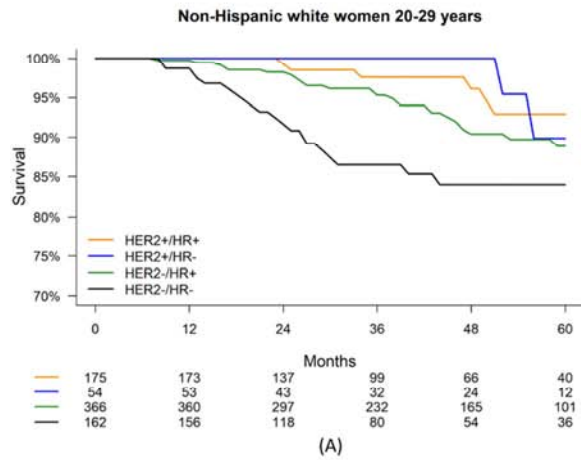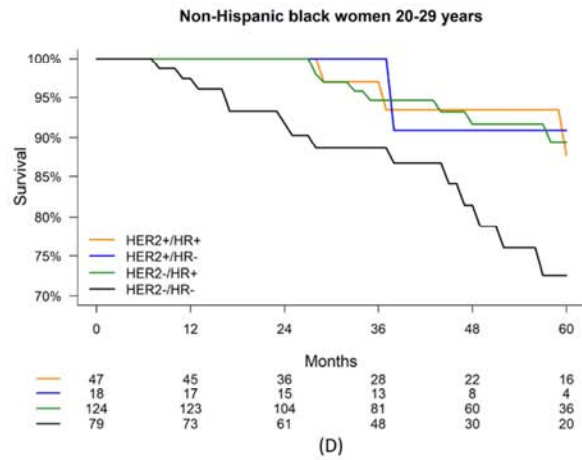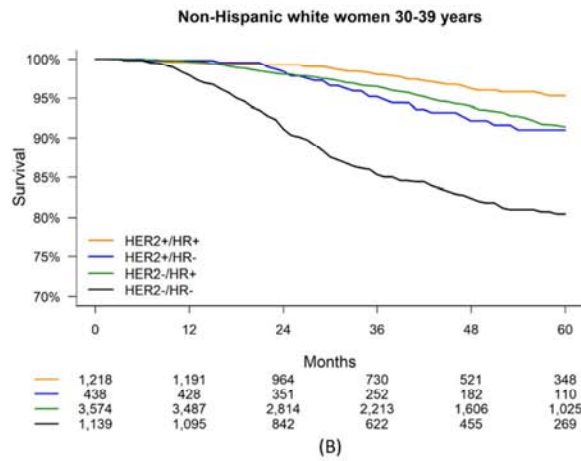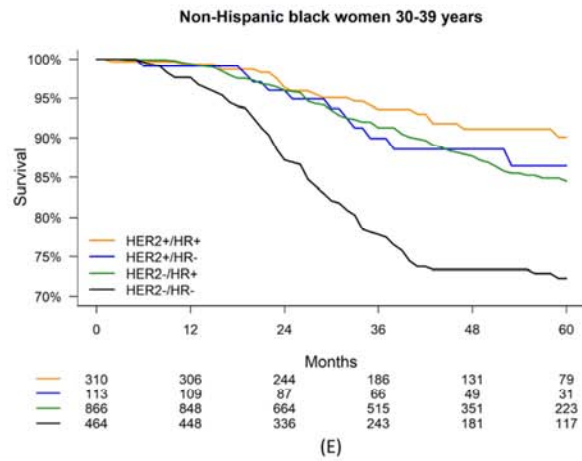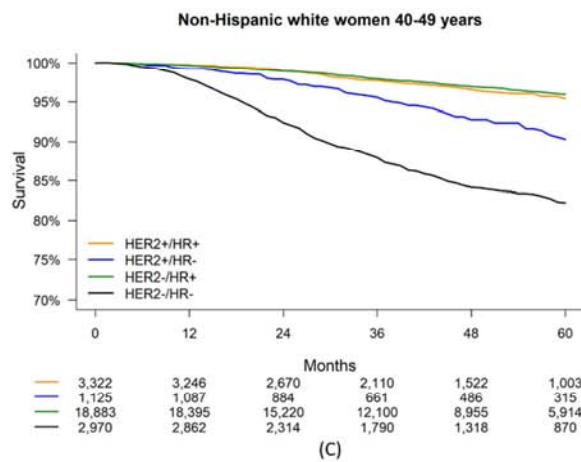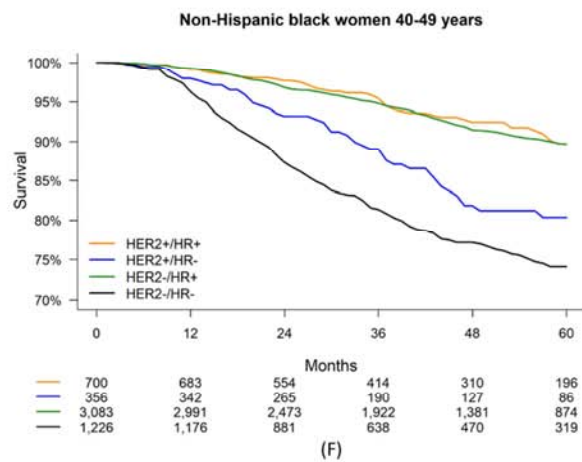

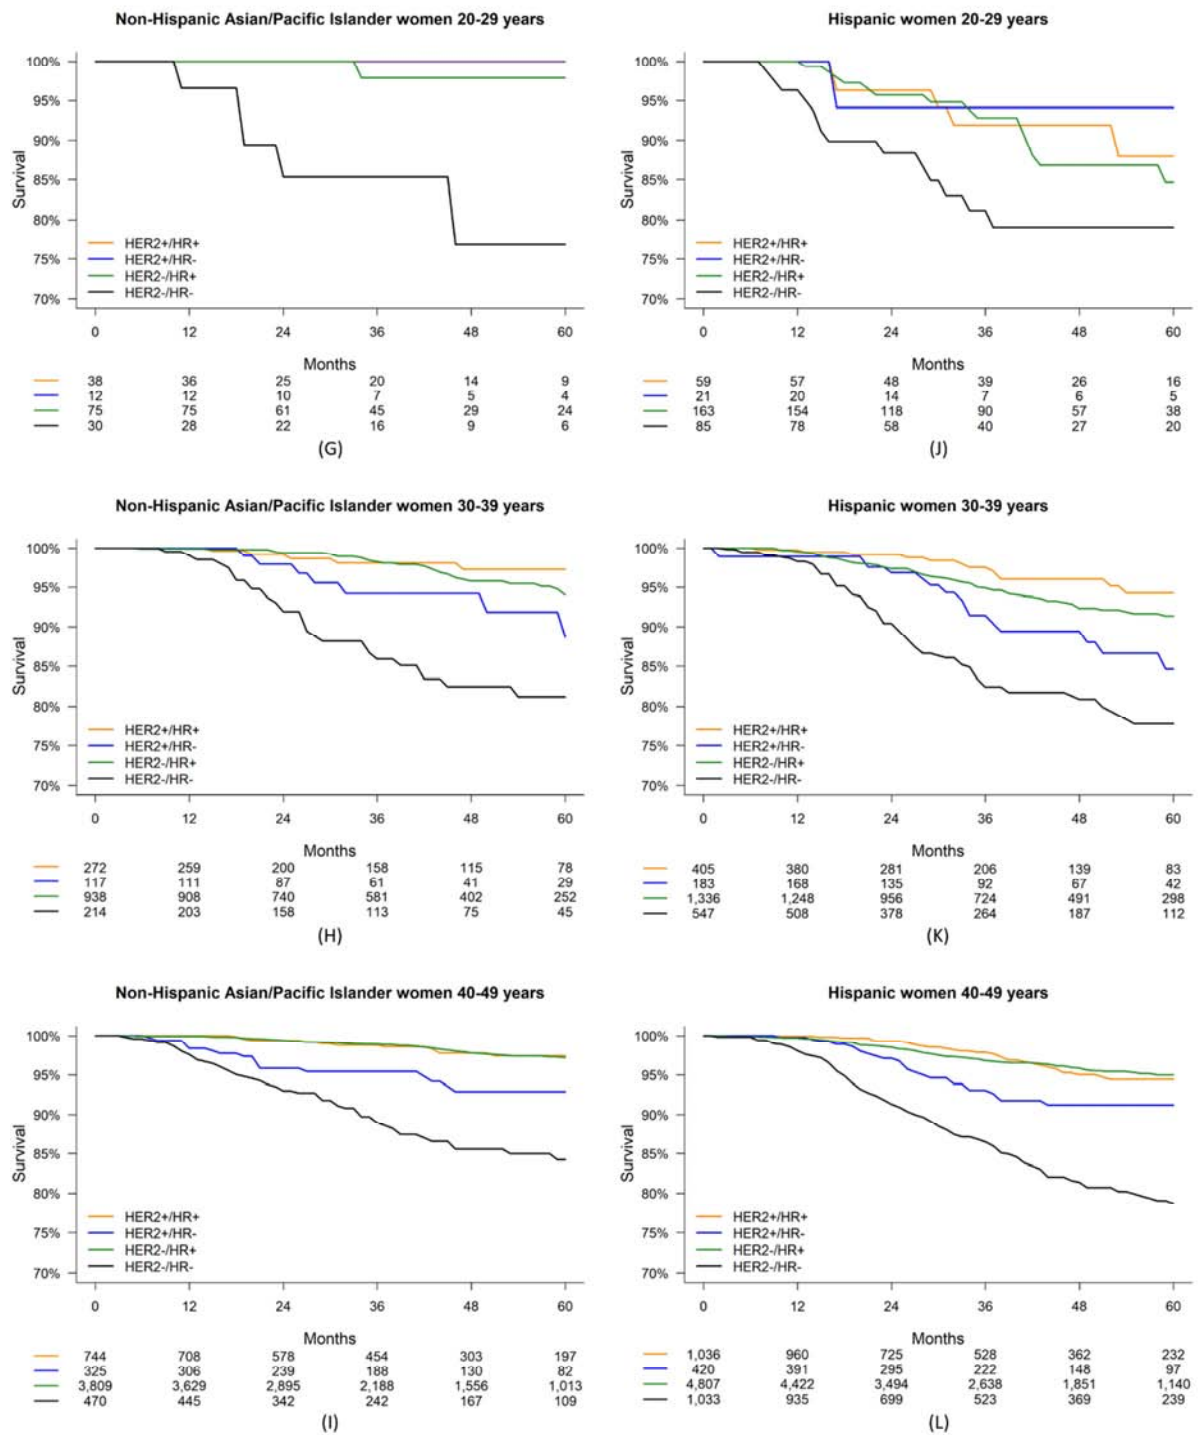

Supplementary Figure S1. Five-year survival by race/ethnicity and HER2/HR status for women aged 20-49 years diagnosed with stage I-III breast cancer, 2010-2015, SEER 18 registries

(A-C) Non-Hispanic white women aged 20-29, 30-39, and 40-49 years. (D-F) Non-Hispanic black women aged 20-29, 30-39, and 40-49 years. (G-I) Non-Hispanic Asian/Pacific Islander women aged 20-29, 30-39, and 40-49 years.

---

years. (J-L) Hispanic women aged 20-29, 30-39, and 40-49 years.

Abbreviations: HER2, human epidermal growth factor receptor-2; HR, hormone receptor; SEER, Surveillance, Epidemiology, and End Results

Numbers of patients at risk are given below the x-axis.

Journal Pre-proof
